# Supplementary material for: The impact of wound pH on the antibacterial properties of Medical Grade Honey when applied to bacterial isolates present in common foot and ankle wounds. An in vitro study
Source: J Foot Ankle Res. 2023 Oct 2;16:66. doi: 10.1186/s13047-023-00653-9 (PMC10544608; doi:10.1186/s13047-023-00653-9)
Supplement: Supplementary file 1 — Additional file 1. [file 13047_2023_653_MOESM1_ESM.xlsx]

## Sheet: TSB Unaltered Controls
TSB Unaltered Controls
* all counts taken for 0.1ml, calculated and displayed as to 1ml
S. aureus
1st run	0hrs count (ml)	Notation	Log10		1st run	24hrs count	Notation	Log10
A	21 on -7	210000000	8.32222		A	98 on -10	980000000000	11.9912
B	86 on -7	860000000	8.9345		B	119 on -10	1190000000000	12.0755
C	32 on-7	310000000	8.49136		C	140 on -10	1400000000000	12.1461
		Average	8.58269				Average	12.071
2nd run	0hrs count	Notation	Log10		2nd run	24hrs count	Notation	Log10
A	48 on -7	480000000	8.68124		A	259 on -10	2590000000000	12.4133
B	276 on -7	2760000000	9.44091		B	118 on -10	1180000000000	12.0719
C	61 on -7	610000000	8.78533		C	40 on -10	400000000000	11.6021
		Average	8.96916				Average	12.0291
3rd run	0hrs count	Notation	Log10		3rd run	24hrs count	Notation	Log10
A	40 on -7	400000000	8.60206		A	163 on -10	1630000000000	12.2122
B	31 on -7	310000000	8.49136		B	157 on -10	1570000000000	12.1959
C	78 on -7	780000000	8.89209		C	294 on -10	294000000000	11.4683
		Average	8.66184				Average	11.9588
S. epidermidis
1st run	0hrs count	Notation	Log10		1st run	24hrs count	Notation	Log10
A	1 on -7	10000000	7		A	61 on-9	6100000000	9.78533
B	4 on -7	40000000	7.60206		B	40 on -9	4000000000	9.60206
C	3 on -7	30000000	7.47712		C	43 on -9	43000000000	10.6335
		Average	7.35973				Average	10.007
2nd run	0hrs count	Notation	Log10		2nd run	24hrs count	Notation	Log10
A	53 on -6	53000000	7.72428		A	35 on -8	3500000000	9.54407
B	72 on -6	72000000	7.85733		B	28 on -8	2800000000	9.44716
C	10 on -6	10000000	7		C	37 on -8	3700000000	9.5682
		Average	7.5272				Average	9.51981
3rd run	0hrs count	Notation	Log10		3rd run	24hrs count	Notation	Log10
A	52 on -7	520000000	8.716		A	27 on -8	2700000000	9.43136
B	46 on -7	460000000	8.66276		B	42 on -8	4200000000	9.62325
C	32 on -7	320000000	8.50515		C	30 on -8	3000000000	9.47712
		Average	8.62797				Average	9.51058
E. coli
1st run	0hrs count	Notation	Log10		1st run	24hrs count	Notation	Log10
A	127 on -7	1270000000	9.1038		A	123 on -10	1230000000000	12.0899
B	28 on -7	280000000	8.44716		B	56 on -10	560000000000	11.7482
C	193 on -7	1930000000	9.28556		C	50 on -10	500000000000	11.699
		Average	8.94551				Average	11.8457
2nd run	0hrs count	Notation	Log10		2nd run	24hrs count	Notation	Log10
A	167 on -7	1670000000	9.22272		A	184 on -10	1840000000000	12.2648
B	62 on -7	620000000	8.79239		B	196 on -10	1960000000000	12.2923
C	196 on -7	1960000000	9.29226		C	59 on-10	590000000000	11.7709
		Average	9.10245				Average	12.1093
3rd run	0hrs count	Notation	Log 10		3rd run	24hrs count	Notation	Log10
A	104 on -7	1040000000	9.01703		A	48 on -10	480000000000	11.6812
B	98 on -7	980000000	8.99123		B	95 on -10	950000000000	11.9777
C	129 on -7	1290000000	9.11059		C	104 on -10	1040000000000	12.017
		Average	9.03962				Average	11.892
P. aeruginosa
1st run	0hrs count	Notation	Log10		1st run	24hrs count	Notation	Log10
A	233 on -7	2330000000	9.36736		A	185 on -10	1850000000000	12.2672
B	204 on -7	2040000000	9.30963		B	76 on-10	760000000000	11.8808
C	97 on 07	970000000	8.98677		C	124 on -10	1240000000000	12.0934
		Average	9.22125				Average	12.0805
2nd run	0hrs count	Notation	Log10		2nd run	24hrs count	Notation	Log10
A	139 on -7	1390000000	9.14301		A	258 on -10	2580000000000	12.4116
B	292 on -7	2920000000	9.46538		B	195 on -10	1950000000000	12.29
C	64 on -7	640000000	8.80618		C	110 on -10	1100000000000	12.0414
		Average	9.13819				Average	12.2477
3rd run	0hrs count	Notation	Log10		3rd run	24hrs count	Notation	Log10
A	24 on -7	240000000	8.38021		A	62 on -10	620000000000	11.7924
B	92 on -7	920000000	8.96379		B	77 on -10	770000000000	11.8865
C	85 on -7	850000000	8.92942		C	28 on -10	280000000000	11.4472
		Average	8.75781				Average	11.7087

## Sheet: TSB pH4
TSB pH4
* all counts taken for 0.1ml, calculated and displayed as to 1ml
S. aureus
	24hrs count	Notation	Log10
A	75 on -2	7500	3.87506
B	49 on -2	4900	3.6902
C	60 on -2	6000	3.77815
		Average	3.78114
S. epidermidis
	24hrs count	Notation	Log10
A	13 on -2	1300	3.11394
B	22 on -2	2200	3.34242
C	21 on -2	2100	3.32222
		Average	3.25953
E. coli
	24hrs count	Notation	Log10
A	61 on -6	61000000	7.78533
B	42 on -2	4200	3.62325
C	50 on -4	500000	5.69897
		Average	5.70252
P. aeruginosa
	24hrs count	Notation	Log10
A	55 on -4	550000	5.74036
B	52 on -4	520000	5.716
C	53 on -4	520000	5.716
		Average	5.72412

## Sheet: TSB pH6
TSB pH6
* all counts taken for 0.1ml, calculated and displayed as to 1ml
S. aureus
	24hrs count	Notation	Log10
A	30 on -8	3000000000	9.47712
B	16 on -8	1600000000	9.20412
C	38 on -8	3800000000	9.57978
		Average	9.42034
S. epidermidis
	24hrs count	Notation	Log10
A	19 on -7	190000000	8.27875
B	5 on -7	50000000	7.69897
C	7 on -7	70000000	7.8451
		Average	7.94094
E. coli
	24hrs count	Notation	Log10
A	73 on -8	7300000000	9.86332
B	49 on -8	4900000000	9.6902
C	57 on -8	5700000000	9.75587
		Average	9.7698
P. aeruginosa
	24hrs count	Notation	Log10
A	1 on -8	100000000	8
B	2 on -8	200000000	8.30103
C	1 on -8	100000000	8
		Average	8.10034

## Sheet: TSB pH7
TSB pH7
* all counts taken for 0.1ml, calculated and displayed as to 1ml
S. aureus
	24hrs count	Notation	Log10
A	74 on -10	740000000000	11.8692
B	65 on -10	650000000000	11.8129
C	89 on -10	890000000000	11.9494
		Average	11.8772
S. epidermidis
	24hrs count	Notation	Log10
A	16 on -8	1600000000	9.20412
B	11 on -8	1100000000	9.04139
C	13 on -8	1300000000	9.11394
		Average	9.11982
E. coli
	24hrs count	Notation	Log10
A	102 on -10	1020000000000	12.0086
B	78 on -10	780000000000	11.8921
C	83 on -10	830000000000	11.9191
		Average	11.9399
P. aeruginosa
	24hrs count	Notation	Log10
A	73 on -10	730000000000	11.8633
B	53 on -10	530000000000	11.7243
C	50 on -10	500000000000	11.699
		Average	11.7622

## Sheet: TSB pH8
TSB pH8
* all counts taken for 0.1ml, calculated and displayed as to 1ml
S. aureus
	24hrs count	Notation	Log10
A	208 on -10	2080000000000	12.3181
B	215 on -10	2150000000000	12.3324
C	262 on -10	2620000000000	12.4183
		Average	12.3563
S. epidermidis
	24hrs count	Notation	Log10
A	56 on -8	5600000000	9.74819
B	73 on -8	7300000000	9.86332
C	25 on -8	2500000000	9.39794
		Average	9.66982
E. coli
	24hrs count	Notation	Log10
A	256 on -10	2560000000000	12.4082
B	192 on -10	1920000000000	12.2833
C	202 on -10	2020000000000	12.3054
		Average	12.3323
P. aeruginosa
	24hrs count	Notation	Log10
A	223 on -10	2230000000000	12.3483
B	175 on -9	175000000000	11.243
C	245 on -10	2450000000000	12.3892
		Average	11.9935

## Sheet: Activon pH4
Activon pH4
S. aureus
1st run	24hrs count	Notation	Log10
A	0	0	0
B	0	0	0
C	0	0	0
2nd run	24hrs count	Notation	Log10
A	0	0	0
B	0	0	0
C	0	0	0
3rd run	24hrs count	Notation	Log10
A	0	0	0
B	0	0	0
C	0	0	0
S. epidermidis
1st run	24hrs count	Notation	Log10
A	0	0	0
B	0	0	0
C	0	0	0
2nd run	24hrs count	Notation	Log10
A	0	0	0
B	0	0	0
C	0	0	0
3rd run	24hrs count	Notation	Log10
A	0	0	0
B	0	0	0
C	0	0	0
E. coli
1st run	24hrs count	Notation	Log10
A	0	0	0
B	0	0	0
C	0	0	0
2nd run	24hrs count	Notation	Log10
A	0	0	0
B	0	0	0
C	0	0	0
3rd run	24hrs count	Notation	Log10
A	0	0	0
B	0	0	0
C	0	0	0
P. aeruginosa
1st run	24hrs count	Notation	Log10
A	0	0	0
B	0	0	0
C	0	0	0
2nd run	24hrs count	Notation	Log10
A	0	0	0
B	0	0	0
C	0	0	0
3rd run	24hrs count	Notation	Log10
A	0	0	0
B	0	0	0
C	0	0	0

## Sheet: Activon pH6
Activon pH6
* all counts taken for 0.1ml, calculated and displayed as to 1ml
S. aureus					Changed to ml value
1st run	24hrs count	Notation	Log10		1st run	24hrs count	Notation	Log10
A	2	2	0.30103		A	0.666667	10	1
B	11	11	1.04139		B	3.66667	36	1.5563
C	24	24	1.38021		C	8	80	1.90309
2nd run	24hrs count	Notation	Log10
A	0	0	0
B	0	0	0
C	0	0	0
3rd run	24hrs count	Notation	Log10
A	0	0	0
B	0	0	0
C	0	0	0
S. epidermidis
1st run	24hrs count	Notation	Log10
A	0	0	0
B	0	0	0
C	0	0	0
2nd run	24hrs count	Notation	Log10
A	0	0	0
B	0	0	0
C	0	0	0
3rd run	24hrs count	Notation	Log10
A	0	0	0
B	0	0	0
C	0	0	0
E. coli
1st run	24hrs count	Notation	Log10
A	5	0	0
B	0	0	0
C	4	0	0
2nd run	24hrs count	Notation	Log10
A	0	0	0
B	0	0	0
C	0	0	0
3rd run	24hrs count	Notation	Log10
A	0	0	0
B	0	0	0
C	0	0	0
P. aeruginosa
1st run	24hrs count	Notation	Log10
A	0	0	0
B	0	0	0
C	0	0	0
2nd run	24hrs count	Notation	Log10
A	0	0	0
B	0	0	0
C	0	0	0
3rd run	24hrs count	Notation	Log10
A	0	0	0
B	0	0	0
C	0	0	0

## Sheet: Activon pH7
Activon pH7
* all counts taken for 0.1ml, calculated and displayed as to 1ml
S. aureus
1st run	24hrs count	Notation	Log10
A	0	0	0
B	0	0	0
C	0	0	0
2nd run	24hrs count	Notation	Log10
A	0	2	0.30103
B	0	1	0
C	0	0	0
			0.100343
3rd run	24hrs count	Notation	Log10
A	0	0	0
B	0	0	0
C	0	0	0
S. epidermidis
1st run	24hrs count	Notation	Log10
A	0
B	0
C	0
2nd run	24hrs count	Notation	Log10
A	0
B	0
C	0
3rd run	24hrs count	Notation	Log10
A	0
B	0
C	0
E. coli
1st run	24hrs count	Notation	Log10		1st run	24hrs count	Notation	Log10
A	0				A	9	90	1.95424
B	0				B	1.66667	16	1.20412
C	0				C	4.33333	43	1.63347
2nd run	24hrs count	Notation	Log10
A	27	27
B	5	5
C	13	12
3rd run	24hrs count	Notation	Log10
A	0
B	0
C	0
P. aeruginosa
1st run	24hrs count	Notation	Log10
A	0
B	0
C	0
2nd run	24hrs count	Notation	Log10
A	0
B	1
C	0
3rd run	24hrs count	Notation	Log10
A	0
B	0
C	0

## Sheet: Activon pH8
Activon pH8
* all counts taken for 0.1ml, calculated and displayed as to 1ml
S. aureus
1st run	24hrs count	Notation	Log10
A	0	0	0
B	0	0	0
C	0	0	0
2nd run	24hrs count	Notation	Log10
A	0	0	0
B	0	0	0
C	0	0	0
3rd run	24hrs count	Notation	Log10
A	0	0	0
B	0	0	0
C	0	0	0
S. epidermidis
1st run	24hrs count	Notation	Log10
A	0
B	0
C	0
2nd run	24hrs count	Notation	Log10
A	0
B	0
C	0
3rd run	24hrs count	Notation	Log10
A	0
B	0
C	0
E. coli
1st run	24hrs count	Notation	Log10
A	2
B	0
C	0
2nd run	24hrs count	Notation	Log10
A	1
B	0
C	0
3rd run	24hrs count	Notation	Log10
A	0
B	0
C	0
P. aeruginosa
1st run	24hrs count	Notation	Log10		1st run	24hrs count	Notation	Log10
A	1				A	0.333333	0	0
B	9				B	5.33333	53	1.72428
C	57				C	19	190	2.27875
2nd run	24hrs count	Notation	Log10
A	0
B	7
C	0
3rd run	24hrs count	Notation	Log10
A	0
B	0
C	0

## Sheet: Data for Graphs
0hours and 24hours counts of unaltered TSB (log10)
TSB Contol (hours)	0	0	0	0 hours	24	24	24	24 hours	Honey unaltered 24 hours
Pseudomonas. aeruginosa	9.22125	9.13819	8.75781	9.03908	11.7087	12.2477	12.0805	12.0123	0
Escherichia coli	8.94551	9.10245	9.03962	9.02919	11.892	12.1093	11.8457	11.949	0
Staphylococcus epidermidis	7.35973	7.5272	8.62797	7.8383	9.51058	10.007	9.51981	9.67911	0
Staphylococcus aureus	8.58269	8.96916	8.66184	8.7379	12.071	12.0291	11.9588	12.0196	0

[truncated: 4 more sheets: Staph Aureus, s epidermidis, E coli, P aerug]
